# Supplementary material for: A Flexible and Wearable Human Stress Monitoring Patch
Source: PubMed Central journal article supplement (PMC4804278; doi:10.1038/srep23468), 2016-03-23
Supplement: srep23468-s1.pdf [file srep23468-s1.pdf]

# A Flexible and Wearable Human Stress Monitoring Patch

Sunghyun Yoon, Jai Kyoung Sim, and Young-Ho Cho\*

NanoSensuating Systems Laboratory, Cell Bench Research Center  
Korea Advanced Institute of Science and Technology (KAIST)  
271 Daehak-ro, Yuseong-gu, Daejeon 305-701, Republic of Korea

E-mail: nanosys@kaist.ac.kr

Table S1 Time to reach the saturation temperature of the electrode by the skin temperature and external temperature.

| External<br>temperature<br><br>Skin<br>temperature | 0 °C      | 10 °C     | 20 °C     | 30 °C     |
|----------------------------------------------------|-----------|-----------|-----------|-----------|
|                                                    | 30.0 °C   | 22.0 msec | 21.5 msec | 21.0 msec |
| 32.5 °C                                            | 33.0 msec | 31.0 msec | 29.5 msec | 28.5 msec |
| 35.0 °C                                            | 41.0 msec | 39.5 msec | 38.0 msec | 36.0 msec |
| 37.5 °C                                            | 47.5 msec | 45.5 msec | 43.5 msec | 41.5 msec |
| 40.0 °C                                            | 52.5 msec | 50.5 msec | 48.5 msec | 46.5 msec |

Table S2 Electrode's saturation temperature by the skin temperature and the external temperature.

| External temperature \ Skin temperature | 0 °C    | 10 °C   | 20 °C   | 30 °C   |
|-----------------------------------------|---------|---------|---------|---------|
| 30.0 °C                                 | 30.0 °C | 30.0 °C | 30.0 °C | 30.0 °C |
| 32.5 °C                                 | 32.5 °C | 32.5 °C | 32.5 °C | 32.5 °C |
| 35.0 °C                                 | 35.0 °C | 35.0 °C | 35.0 °C | 35.0 °C |
| 37.5 °C                                 | 37.5 °C | 37.5 °C | 37.5 °C | 37.5 °C |
| 40.0 °C                                 | 40.0 °C | 40.0 °C | 40.0 °C | 40.0 °C |

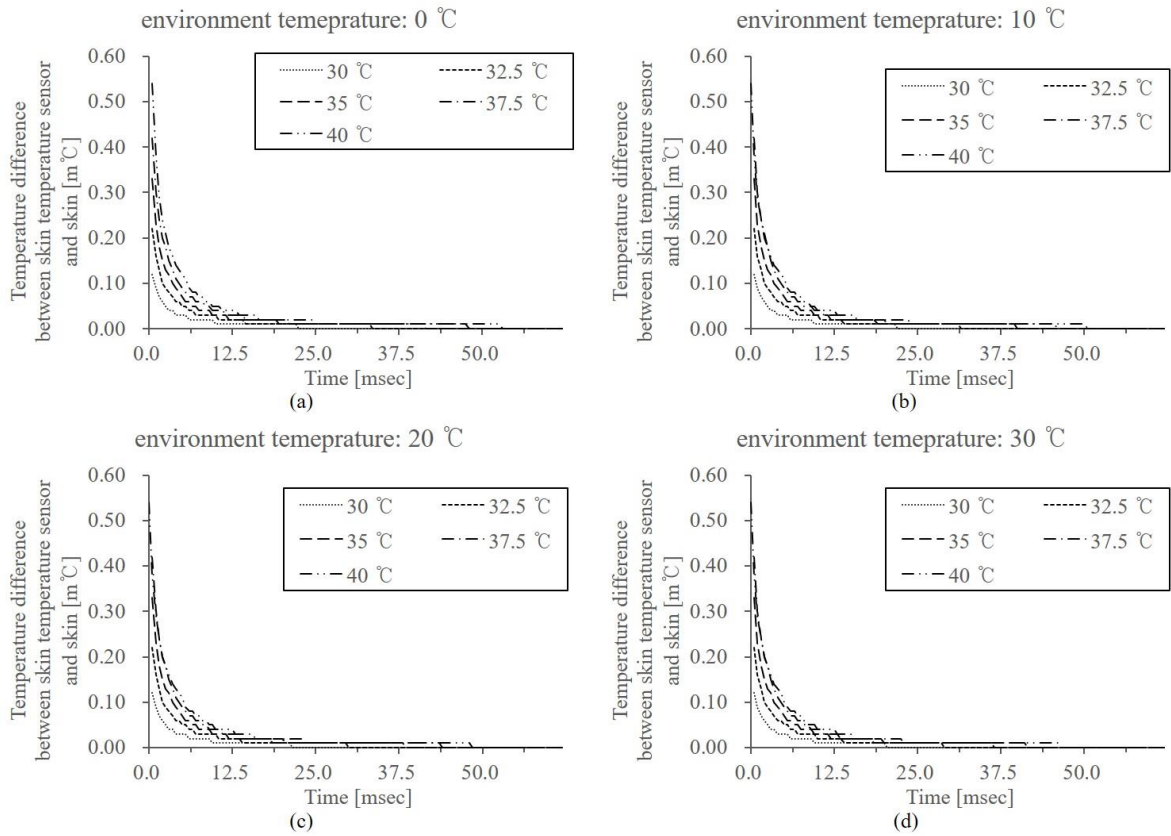

Figure S1 Time response of the temperature difference between the skin and the electrode at external temperature of (a) 0 °C; (b) 10 °C; (c) 20 °C; (d) 30 °C.
